# Supplementary material for: Visualization of c-di-GMP in multicellular Dictyostelium stages
Source: Frontiers journal article supplement (doi:10.3389/fcell.2023.1237778), 2023-07-20
Supplement: Data_Sheet_1.pdf [file Data_Sheet_1.pdf]

## Supplementary Materials

### Visualization of c-di-GMP signal in *Dictyostelium* multicellular body

Hayato Ide, Yukihiya Hayashida, Yusuke V. Morimoto\*

\* **Correspondence:** Yusuke V. Morimoto: yvm001@phys.kyutech.ac.jp

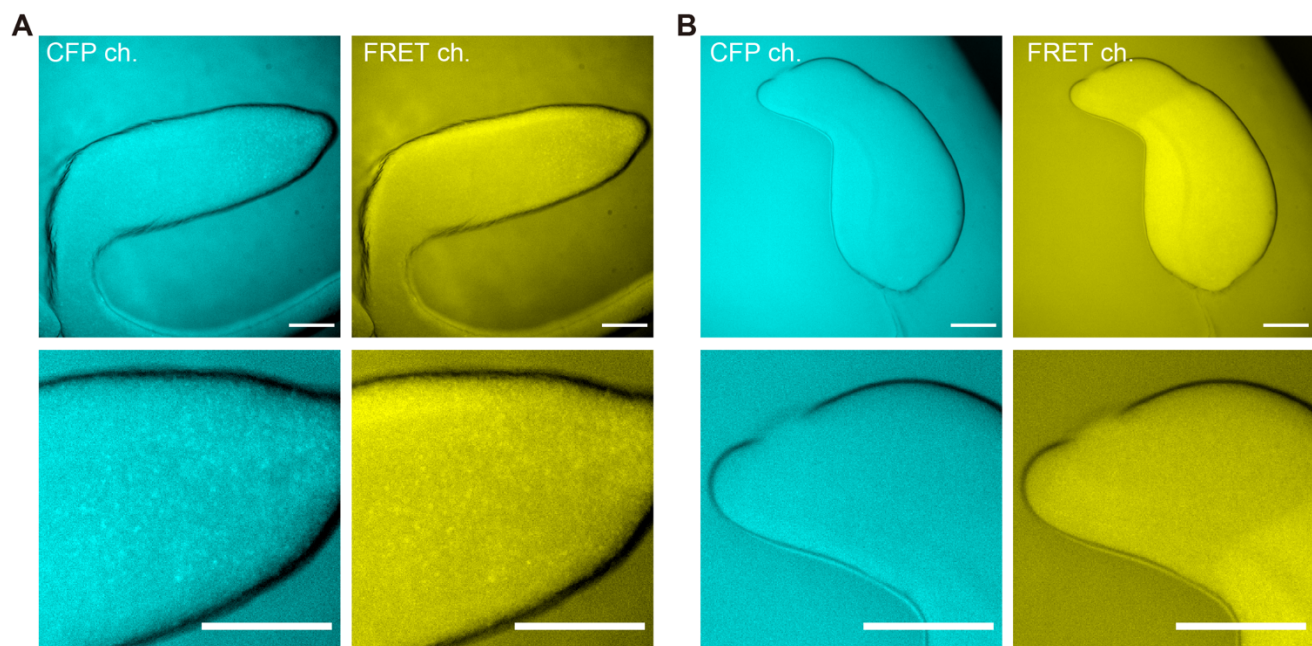

**Supplementary Figure S1.** Representative fluorescence images of autofluorescence in *Dictyostelium* multicellular body are shown. **(A)** Fluorescence images of autofluorescence of a multicellular body grown in HL5 medium including glucose. The lower panels show the enlargement of upper images. **(B)** Fluorescence images of autofluorescence of a multicellular body grown in low fluorescence medium. The lower panels show the enlargement of upper images. Scale bars, 100  $\mu\text{m}$ .

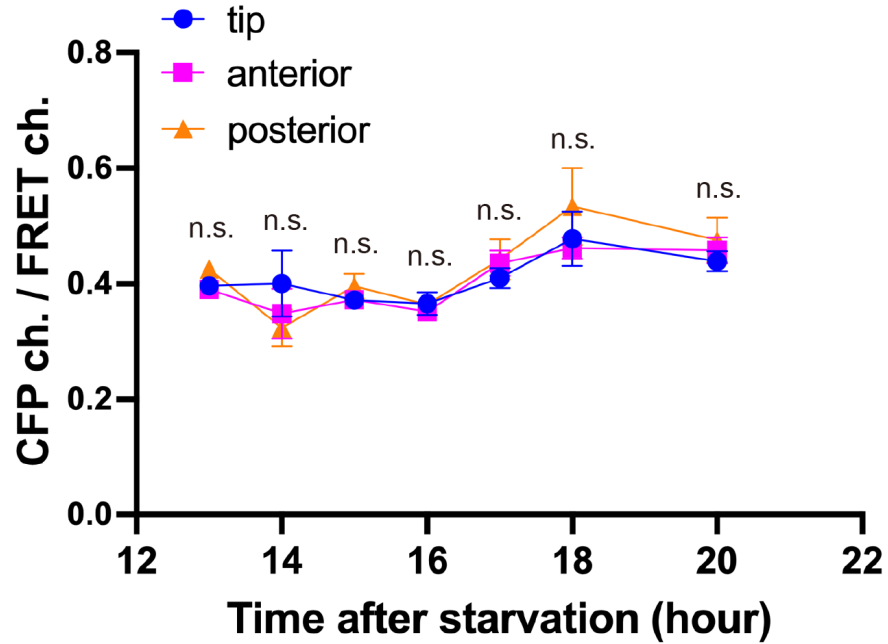

**Supplementary Figure S2.** Timelapse measurement of the autofluorescence in AX2 during development. Ratio values of CFP/FRET channels for each region within the multicellular body at each time point after starvation. Mean  $\pm$  standard errors are shown ( $n = 9$ ). Data were assessed with ANOVA with Tukey's multiple comparisons test; n.s., no significant difference.

### Supplementary Table S1

*Dictyostelium discoideum* strains used in this study.

| Strain name                                  | Characteristics                | Background | Source or reference                                 |
|----------------------------------------------|--------------------------------|------------|-----------------------------------------------------|
| AX2                                          | wild type                      | AX2        | Lab stock                                           |
| <i>dgcA</i> <sup>-</sup>                     | <i>dgcA</i> <sup>-</sup> (bsR) | AX2        | (Chen and Schaap, 2012)<br>NBRP-nenkin (ID: S90402) |
| mYpet-YcgR-mCypet /AX2                       | (neoR)                         | AX2        | This study                                          |
| mYpet-YcgR(R118A)-mCypet /AX2                | (neoR)                         | AX2        | This study                                          |
| mYpet-YcgR-mCypet / <i>dgcA</i> <sup>-</sup> | (neoR)                         | AX2        | This study                                          |

### Supplementary Table S2

Plasmids used in this study.

| Plasmid name                    | Characteristics          | Backbone      | Source or reference                         |
|---------------------------------|--------------------------|---------------|---------------------------------------------|
| pMMB67EH-Spy                    | mYpet-YcgR-mCypet        | pMMB67EH      | (Christen et al., 2010)<br>Addgene (#90102) |
| pDM304/mYpet-YcgR-mCypet        | mYpet-YcgR-mCypet        | pDM304 (neoR) | This study                                  |
| pDM304/mYpet-YcgR(R118A)-mCypet | mYpet-YcgR(R118A)-mCypet | pDM304 (neoR) | This study                                  |
